## **NAToRA, a relatedness-pruning method to minimize the loss of dataset size in genetic and omics analyses**

Thiago Peixoto Leal<sup>1,2</sup>, Vinicius C Furlan<sup>1</sup>, Mateus Henrique Gouveia<sup>1,3</sup>, Julia Maria Saraiva Duarte<sup>1</sup>, Pablo AS Fonseca<sup>1,4</sup>, Rafael Tou<sup>1</sup>, Marilia de Oliveira Scliar<sup>5</sup>, Gilderlanio Santana de Araujo<sup>6</sup>, Camila Zolini<sup>1,7,8</sup>, Maria Gabriela Campolina Diniz Peixoto<sup>9</sup>, Maria Raquel Santos Carvalho<sup>1</sup>, Maria Fernanda Lima-Costa<sup>10</sup>, Robert H Gilman<sup>11,12</sup>, Eduardo Tarazona-Santos<sup>1,8, 11</sup>, Máira Ribeiro Rodrigues<sup>1,13</sup>

<sup>1</sup> Departamento de Biologia Geral, Universidade Federal de Minas Gerais, Belo Horizonte, Brazil.

<sup>2</sup> Lerner Research Institute, Genomic Medicine, Cleveland Clinic Foundation, Cleveland, OH, USA.

<sup>3</sup> Center for Research on Genomics & Global Health, National Human Genome Research Institute, National Institutes of Health, Bethesda, Maryland, United States of America

<sup>4</sup> Centre for Genetic Improvement of Livestock, Department of Animal Biosciences, University of Guelph, Guelph, Canada

<sup>5</sup> Centro de Pesquisa sobre o Genoma Humano e Células-Tronco, Instituto de Biociências, Universidade de São Paulo, São Paulo, Brazil

<sup>6</sup> Laboratório de Genética Humana e Médica, Programa de Pós-Graduação em Biologia Molecular, Instituto de Ciências Biológicas, Universidade Federal do Pará, Belem, Brazil.

<sup>7</sup> Beagle, Belo Horizonte, Brazil.

<sup>8</sup> Mosaico Translational Genomics Initiative, Belo Horizonte, Brazil

<sup>9</sup> Embrapa Gado de Leite, Embrapa, Juiz de Fora, Brazil

<sup>10</sup> Centro de Pesquisa Rene Rachou, Fundação Oswaldo Cruz, Belo Horizonte, Brazil

<sup>11</sup> Universidad Peruana Cayetano Heredia, Lima, Perú

<sup>12</sup> Dept of International Health, Johns Hopkins School of Public Health Baltimore, Baltimore, USA.

<sup>13</sup> Departamento de Genética e Biologia Evolutiva, Instituto de Biociências, Universidade de São Paulo, Brazil.

## **Abstract**

Genetic and omics analyses frequently require independent observations, which is not guaranteed in real datasets. When relatedness can not be accounted for, solutions involve removing related individuals (or observations) and, consequently, a reduction of available data. We developed a network-based relatedness-pruning method that minimizes dataset reduction while removing unwanted relationships in a dataset. It uses node degree centrality metric to identify highly connected nodes (or individuals) and implements heuristics that approximate the minimal reduction of a dataset to allow its application to large datasets. NAToRA outperformed two popular methodologies (implemented in software PLINK and KING) by showing the best combination of effective relatedness-pruning, removing all relatives while keeping the largest possible number of individuals in all datasets tested and also, with similar or lesser reduction in genetic diversity. NAToRA is freely available, both as a standalone tool that can be easily incorporated as part of a pipeline, and as a graphical web tool that allows visualization of the relatedness networks.

NAToRA also accepts a variety of relationship metrics as input, which facilitates its use. We also present a genealogies simulator software used for different tests performed in the manuscript.

**Keywords:** complex network theory, population genetics, genetic kinship

**This manuscript contains a Supplementary Information file.**

In omics research, we frequently apply methods that require independent observations. However, when these observations are individuals from a population, they may be relatives (i.e. not independent). A common solution is to exclude all or part of relatives to reduce dependence, but more efficient solutions are needed to reduce dataset pruning (Supplementary Information: Section 1, SI:S1). We present a relatedness-pruning method based on Complex Network Theory called NAToRA (Network Algorithm To Relatedness Analysis), which simultaneously minimizes the number of observations to be excluded from datasets, increasing their independence.

NAToRA is an algorithm that minimizes the number of individuals to be removed from a dataset. In the context of complex network theory, NAToRA finds the maximum clique in the complement networks. However, because this is an NP-Complete Problem [1], and it is computationally infeasible in several cases, we developed an heuristic version of NAToRA that approximates the minimal reduction of the dataset. In general NAToRA models relatives as a network in which individuals (or more in general, observations) are nodes and relatedness coefficients between them are weights of their connections (or edges). In this network, genetically-related individuals called network families are sets of nodes that have at least one sequence of edges connecting all of them. Contrarily, unrelated individuals (or related below a cutoff value) are represented by disconnected

nodes. The algorithm receives two inputs: (i) an adjacency list containing pairs of individuals and their relatedness coefficients (Figure 1(a), SI:S2), and (ii) a relatedness cutoff value indicating the maximum of the relatedness coefficient to be allowed after pruning (e.g., corresponding to third-degree kinship and below, Table S1). NAToRA creates a network containing only the individuals linked by relatedness coefficients greater than the cutoff value provided by the user (Figure 1(b), illustrating a third-degree cutoff). From this network, the algorithm first detects and reports network families from the matrix of relatedness coefficients (an information that may be used as a categorical variable in different instances). Then, for each detected family, the heuristic algorithm iteratively prunes individuals with more links than others (i.e., with higher node degree centrality (NDC), [1]) (Figure 1(c), (d), (e), (f)). NDC is a node metric based on its number of edges and it was chosen after comparisons with alternative metrics (SI: S3-S4). If there are individuals with equal NDC, NAToRA prunes those with the highest sum of its edges' weights. If there is another tie, the algorithm removes one of them randomly. The output is a list of individuals to be excluded from the dataset (Figure 1(g)). These comparisons were performed using pseudo-genealogies generated by a *genealogy simulator* that we developed, described in detail in SI:S3. This simulator aims to create genealogy with reproductive behavior similar to expected in human populations based on parameters provided by the user, allowing to create several different scenarios. After generating the genealogy, the algorithm calculates the theoretical kinship coefficient (Table S1) among all pairs of related individuals.

We tested NAToRA using relatedness matrices constructed from three genome-wide datasets including related individuals: (i) The Bambuí Cohort Study of Aging (BAMBUÍ) (n=1,442 admixed brazilians) [2], (ii) Matsigenkas indigenous from the Peruvian Amazon Yunga (SHIMAA) (n=45) [3], (iii) Guzerá *Bos indicus* dairy cattle from the brazilian National Breeding

Program (GUZERÁ) (n=1,036) [4] (SI: S5). The study was approved by the Institutional Review Board of the participating institutions.

Overall, NAToRA performs better than relatedness-pruning methods implemented in popular genetics software PLINK v1.90b6.9 [5] and KING 2.2.4 (Kinship-based INference for Genome-wide association studies) [6], showing the best combination of effective relatedness-pruning by removing all unwanted relationships while keeping the largest possible number of individuals in all datasets (Table 1, SI: S7). Specifically, PLINK showed the highest number of remaining individuals in all datasets but it did not exclude all relationships above the relatedness cutoff. KING and NAToRA had similar performances for Bambuí and Guzerá datasets, but NAToRA kept more individuals and KING did not exclude any related individuals in the Shimaá dataset. Also, to assess the impact of pruning individuals to the overall dataset genetic diversity, we analyzed allele frequency patterns and principal components before and after the pruning process. The NAToRA methodology maintains a large part of the variability in all analyzes, showing a better or comparable performance to PLINK and KING, while the latter two softwares do not guarantee the removal of the entire relationship from the dataset (SI: S8).

NATORA presents three additional advantages. First, its flexibility in accepting different similarity metrics for relatedness-pruning (SI: S6-S7), while PLINK's and KING's pruning methods are tied to their own metrics of relatedness (Table 1). For example, NAToRA is also compatible with relatedness metrics calculated by the REAP method (Relatedness Estimation in Admixed Populations) [7], which is more appropriate for admixed populations than PLINK and KING.

Second, although NAToRA provides an alternative to PLINK and KING's relatedness-pruning methods, it can still be used in pipelines that include broader use of these software, such as genome-wide association testing. For example, one can use PLINK, KING, or other software to perform data quality control and to calculate relatedness metrics, and include NAToRA in the relatedness-pruning step (see NAToRA's User Guide, SI:S9) to minimize dataset reduction.

Third, NAToRA also provides a function that partitions the dataset in subsets of unrelated individuals, without excluding any individual, for analyses that can be performed with subsets of independent data that can be later combined, as in ADMIXTURE ancestry analysis in [8] (SI: S10). Importantly, other applications of NAToRA rely on its identification of individuals with the highest centrality in a network. These individuals may be conceived as a reduced set of the most representative individuals of their families. This concept, for instance, may be applied in conservation genetics of small natural populations, to select individuals for reproduction. In omics research, this application may allow to select representative individuals or observations for follow-up experiments.

## **Conclusions**

Considering the importance of the number of individuals (observations) to gain statistical power, NAToRA provides both, a minimal reduction of sample size and an effective removal of undesired kinship relationships. NAToRA is freely available, both as a standalone tool that can be easily incorporated as part of an analysis pipeline, and as a graphical web tool that allows visualization of the relatedness networks.

## **Availability of supporting source code and requirements**

Project name: NAToRA

Project home page: [https://github.com/ldgh/NAToRA\\_Public](https://github.com/ldgh/NAToRA_Public)

Operating system(s): Platform independent

Programming language: NAToRA was implemented in Python and the the scripts that compose the NAToRA toolkit was implemented in Perl

Other requirements: Python3 or higher and library NetworkX 2.0 or higher

License: GNU

### **Data Availability**

All the data used on this work is freely available at [https://github.com/ldgh/NAToRA\\_Public](https://github.com/ldgh/NAToRA_Public) on

Datasets folder

### **Competing interests:**

none declared

### **Funding**

CAPES Foundation from the Brazilian Ministry of Education, Brazilian National Research Council (CNPq), Minas Gerais State Agency for Research (FAPEMIG) and Brazilian Ministry of Health (DECIT-MS, Genomas Brazil Program).

### **Authors' contributions**

|                                        |                                                                                                                |
|----------------------------------------|----------------------------------------------------------------------------------------------------------------|
| Thiago Peixoto Leal                    | Conceptualization, Investigation, Formal Analysis, Software, Methodology, Writing - Original Draft Preparation |
| Vinicius C Furlan                      | Software, Writing - Review & Editing                                                                           |
| Mateus Henrique Gouveia                | Methodology, Writing - Original Draft Preparation, Writing - Review & Editing                                  |
| Julia Maria Saraiva Duarte             | Formal Analysis, Writing - Review & Editing                                                                    |
| Pablo AS Fonseca                       | Resources, Writing - Review & Editing                                                                          |
| Rafael Tou                             | Formal Analysis, Writing - Review & Editing                                                                    |
| Marilia de Oliveira Scliar             | Methodology, Writing - Original Draft Preparation, Writing - Review & Editing                                  |
| Gilderlanio Santana de Araujo          | Methodology, Writing - Original Draft Preparation, Writing - Review & Editing                                  |
| Camila Zolini                          | Supervision, Resources, Writing - Review & Editing                                                             |
| Maria Gabriela Campolina Diniz Peixoto | Resources, Writing - Review & Editing                                                                          |
| Maria Raquel Santos Carvalho           | Resources, Writing - Review & Editing                                                                          |
| Maria Fernanda Lima-Costa              | Resources, Writing - Review & Editing                                                                          |
| Robert H Gilman                        | Resources, Writing - Review & Editing                                                                          |
| Eduardo Tarazona-Santos                | Supervision, Writing - Original Draft Preparation                                                              |
| Maíra Ribeiro Rodrigues                | Supervision, Writing - Original Draft Preparation                                                              |

## **Acknowledgements**



Not applicable

## References

1. Newman M. *Networks: an introduction*. Oxford: Oxford University Press; 2010.
2. Kehdy FSG, Gouveia MH, Machado M, Magalhães WCS, Horimoto AR, Horta BL, et al.. Origin and dynamics of admixture in Brazilians and its effect on the pattern of deleterious mutations. *Proc. Natl. Acad. Sci. USA*. 112:8696–7012015
3. Borda V, Alvim I, Mendes M, Silva-Carvalho C, Soares-Souza GB, Leal TP, et al.. The genetic structure and adaptation of Andean highlanders and Amazonians are influenced by the interplay between geography and culture. *PNAS*. 2020; doi: 10.1073/pnas.2013773117.
4. Peixoto MGCD, Bruneli FAT, Bergmann JAG, Santos GG dos, Carvalho MRS, Brito LF, et al.. Environmental and genetic effects on the temperament variability of Guzerá (*Bos indicus*) females. *Livestock Research for Rural Development*. 2016
5. Purcell S, Neale B, Todd-Brown K, Thomas L, Ferreira MAR, Bender D, et al.. PLINK: A Tool Set for Whole-Genome Association and Population-Based Linkage Analyses. *The American Journal of Human Genetics*. 2007; doi: 10.1086/519795.
6. Manichaikul A, Mychaleckyj JC, Rich SS, Daly K, Sale M, Chen W-M. Robust relationship inference in genome-wide association studies. *Bioinformatics*. 2010; doi: 10.1093/bioinformatics/btq559.
7. Thornton T, Tang H, Hoffmann TJ, Ochs-Balcom HM, Caan BJ, Risch N. Estimating Kinship in Admixed Populations. *The American Journal of Human Genetics*. 2012; doi: 10.1016/j.ajhg.2012.05.024.
8. Lima-Costa MF, Mambrini JV de M, Leite MLC, Peixoto SV, Firmo JOA, Loyola Filho AI de, et al.. Socioeconomic Position, But Not African Genomic Ancestry, Is Associated With Blood Pressure in the Bambui-Epigen (Brazil) Cohort Study of Aging. *Hypertension*. 2016; doi: 10.1161/HYPERTENSIONAHA.115.06609.

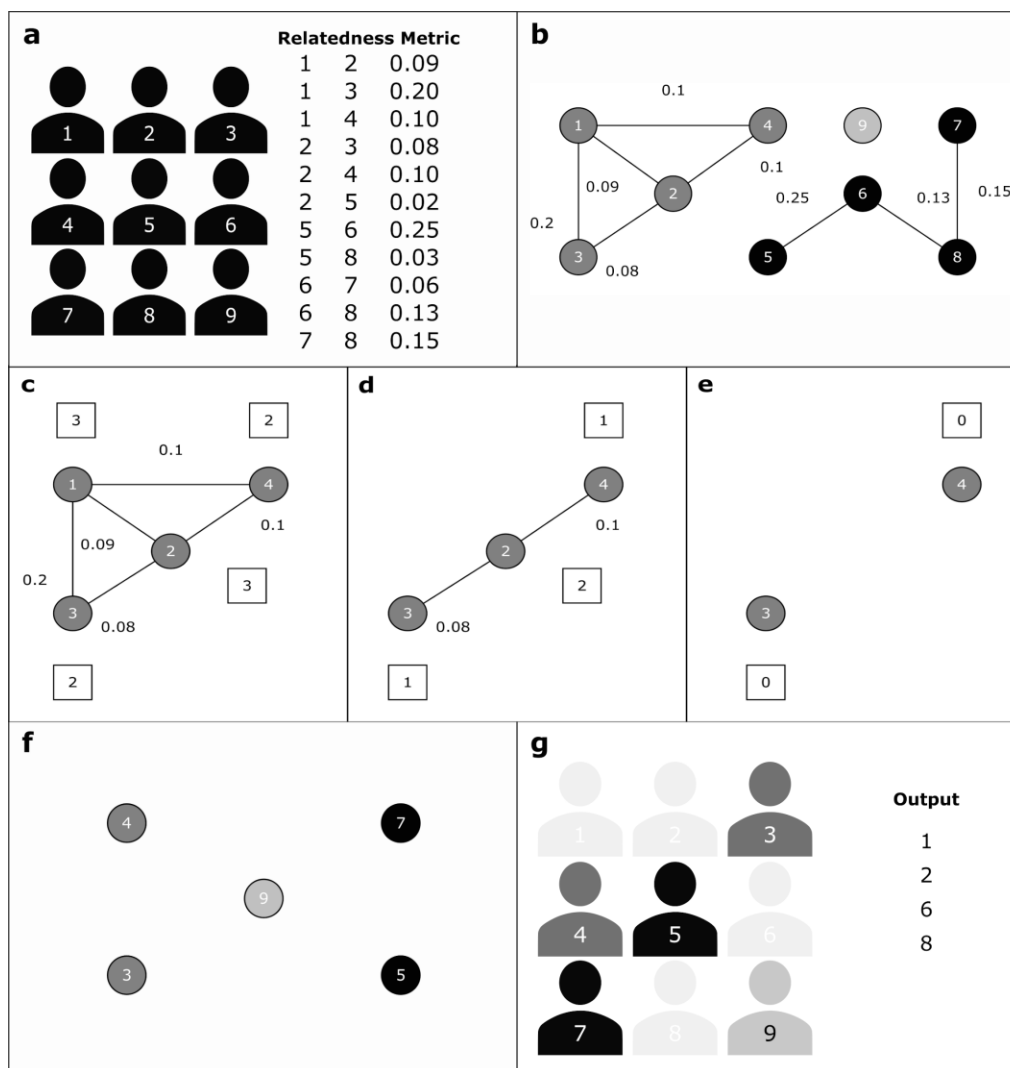

Figure 1. Overview of NAToRA's (Network Algorithm To Relationship Analysis) network-based algorithm. (a) input file with relatedness metrics for pairs of individuals. (b) relatedness network with kinship cutoff of 0.07; grey-scale colours represent families of genetically-related individuals. (c), (d) and (e) show the node elimination process for the dark grey family component , in which

individuals with the highest node centrality degree (NCD, denoted in white boxes) are iteratively removed (in this case the individuals 1 and 2 with NCD=3). (f) relatedness-pruned network. (g) output file with a list of individuals to be removed from the dataset.

Table 1. Comparison between PLINK, KING and NAToRA relatedness-pruning methods. Values show the percentage of dataset reduction and relatedness reduction. NA values indicate that the method did not work. Bold values indicate the best result in each pairwise comparison. We used 2nd-degree kinship (0.0884) as the cutoff value.

| Metric             | PI_HAT           |              |                       |       | Kinship Coefficient |       |                       |               |
|--------------------|------------------|--------------|-----------------------|-------|---------------------|-------|-----------------------|---------------|
|                    | Sample reduction |              | Relatedness reduction |       | Sample reduction    |       | Relatedness reduction |               |
|                    | NAToRA           | PLINK        | NAToRA                | PLINK | NAToRA              | KING  | NAToRA                | KING          |
| BAMBUÍ<br>N= 1,442 | 39.7%            | <b>37.0%</b> | <b>100.0%</b>         | 85.0% | <b>34.2%</b>        | 41.8% | <b>100.0%</b>         | 99.9%         |
| SHIMAA<br>N=42     | 48.9%            | <b>42.2%</b> | <b>100.0%</b>         | 92.0% | <b>44.4%</b>        | NA    | <b>100.0%</b>         | NA            |
| GUZERÁ<br>N=1,036  | 83.0%            | <b>79.7%</b> | <b>100.0%</b>         | 98.0% | <b>79.0%</b>        | 91.5% | <b>100.0%</b>         | <b>100.0%</b> |
